# Supplementary material for: A Screening Approach to Assess the Impact of Various Commercial Sources of Crude Marine λ-Carrageenan on the Production of Oligosaccharides with Anti-Heparanase and Anti-Migratory Activities
Source: Preprints.org preprint supplement (doi:10.20944/preprints202303.0374.v1), 2023-03-21
Supplement: Supplementary file 1 [file supplementary]

## Sheet: Tableau final publi Chanez
Entry	tR	MSE or MS/MS	Ion (m/z)			Ionization	Molecular formula	Candidate	λ-CO_1	λ-CO_3	λ-CO_2	λ-CO_5	λ-CO_4
			Experimental value	Predicted value	Resolution (ppm)
1	1.04	MSE	421.063	421,065749	6.52867	[M-H]-	C12H22O14S	Gal(OSO3-)-Gal
2	1.09	MS/MS	421.065	421,065749	2.2538	[M-H]-	C12H22O14S	Gal(OSO3-)-Gal
3	1.14	MSE	421.064	421,065749	3.67876	[M-H]-	C12H22O14S	Gal(OSO3-)-Gal
4	1.33	MSE	421.063	421,065749	5.81619	[M-H]-	C12H22O14S	Gal(OSO3-)-Gal
5	2.73	MS/MS	399.022	399,021479	2.30815	[M-2H+Na]-	C10H17NaO13S	C4H5O5-Gal(OSO3-)
6	3.28	MS/MS	149.009	149.009	1.08047	[M-H]-	C4H6O6	Gal minus C2H6
7	3.44	MSE	419.05	419,050099	0.474884	[M-H]-	C12H20O14S	Gal-galactonolactone-(OSO3-)
8	3.54	MSE	275.008	275,00784	0.509076	[M-H]-	C6H12O10S	Galactonic acid(OSO3-)
9	3.63	MSE	419.049	419,050099	1.66806	[M-H]-	C12H20O14S	Gal-galactonolactone-(OSO3-)
10	4.21	MSE	616.156	616.159	4.15802	[M-2H+heptylammonium]-	C19H39NO17S2	Gal(OSO3-)-Gal-(OSO3-)
11	4.33	MSE	565.105	565,108008	5.85375	[M-H]-	C18H30O18S	Gal(OSO3-)-Gal-AnGal
12	4.99	MS/MS	391.018	391,018799	1.27615	[M-H]-	C16H24O18S	C4H4O5-Gal-(OSO3-)-AnGal
13	5.06	MSE	535.06	535,061057	2.34926	[M-H]-	C16H24O18S	C4H4O5-Gal-(OSO3-)-AnGal
14	5.18	MSE	391.018	391,018799	2.04338	[M-H]-	C10H16O14S	C4H4O5-Gal-(OSO3-)
15	5.2	MS/MS	683.044	683.042	3.07448	[M-2H+Na]-	C18H28O22S2	Gal(OSO3-)-Gal-Gal(OSO3-)
16	5.45	MSE	520.988	520,988858	1.83881	[M-2H+Na]-	C12H19NaO17S2	AnGal-galactonic acid(OSO3-)2
17	5.53	MS/MS	228.965	228.966	2.07454	[M-H]-	C4H6O9S	C4H4O5-(OSO3-)
18	5.78	MSE	661.058	661,059736	2.77736	[M-H]-	C18H30O22S2	Gal-AnGal-galactonic acid-(OSO3-)2
19	6.28	MS/MS	696.113	696.115	3.26957	[M-2H+heptylammonium]-	C12H22O20S3	Gal(OSO3-)-Gal-Gal-(OSO3-)
20	6.34	MSE	645.061	645,064822	6.39006	[M-H]-	C18H30O21S2	Gal(OSO3-)-Gal-AnGal-(OSO3-)
21	7.42	MSE	776.196	776.196	0.0824534	[M-2H+heptylammonium]-	C25H47NO22S2	Galactonic acid-Gal-AnGal-(OSO3-)2
22	7.45	MS/MS	856.15	856.153	2.59767	[M-2H+heptylammonium]-	C18H30O25S3	Gal-Gal-galactonolactone-(OSO3-)3
23	7.52	MSE	805.095	805,101995	9.30938	[M-H]-	C24H38O26S2	Galactonic acid -Gal-AnGal-(OSO3-)-AnGal-(OSO3-)
24	8.1	MS/MS	470.975	470.976	1.11258	[M-H]-	C10H16O17S2	C4H4O4-(OSO3-)-galactonolactone(OSO3-)
25	9.73	MS/MS	586.11	586.112	2.60019	[M-2H+heptylammonium]-	C10H16O17S2	C4H4O4-(OSO3-)-galactonolactone(OSO3-)
26	9.74	MSE	586.109	586,111712	3.94464	[M-2H+heptylammonium]-	C17H33NO17S2	C4H4O5-Gal-(OSO3-)2
27	9.88	MSE	712.985	712.985	0.350638	[M-H]-	C16H26O25S3	C4H4O5-Gal(OSO3-)-Gal-(OSO3-)2
28	10.03	MSE	810.119	810,110785	10.0171	[M-2H+heptylammonium]-	C23H41NO24S3	C4H4O5-Gal(OSO3-)2-AnGal-(OSO3-)
29	10.63	MSE	1248.35	1248,354126	5.06747	[M-4H+3heptylammoniums]-	C39H83N3O31S5	Gal(OSO3-)-Gal-Gal-(OSO3-)4
30	10.9	MSE	586.109	586,111712	3.94464	[M-2H+heptylammonium]-	C17H33NO17S2	C4H4O5-Gal-(OSO3-)2
31	10.92	MSE	810.119	810,110785	10.0171	[M-2H+heptylammonium]-	C23H41NO24S3	C4H4O5-Gal(OSO3-)2-AnGal-(OSO3-)
32	10.92	MSE	925.242	925,246884	5.60283	[M-3H+2heptylammoniums]-	C30H58N2O24S3	C4H4O5-Gal(OSO3-)2-AnGal-(OSO3-)
33	10.98	MS/MS	666.066	666.069	3.339	[M-2H+heptylammonium]-	C10H16O20S3	C4H7O8(OSO3-)-Gal2(OSO3-)
34	11.55	MSE	943.253	943,257449	4.82265	[M-3H+2heptylammoniums]-	C30H60N2O25S3	C4H4O5-Gal-Gal-(OSO3-)3
35	11.55	MSE	633.027	633.028	2.90034	[M-H]-	C16H26O22S2	C4H5O5-Gal-Gal-(OSO3-)2
36	13.33	MSE	525.555	525.557	3.18329	[M-5H+3heptylammoniums]2-	C29H51NO32S4	C4H4O4(OSO3-)-Gal-Gal-(OSO3-)4-AnGal
